# Supplementary material for: Tailored nanotopography of photocurable composites for control of cell migration
Source: Royal Society of Chemistry journal article supplement (doi:10.1039/d0ra06530g), 2021-01-01
Supplement: d0ra06530g7.pdf [file d0ra06530g7.pdf]

## Electronic Supplementary Information (ESI) for:

# Tailored nanotopography of photocurable composites for control of cell migration

Sebastian Hasselmann,<sup>a</sup> Caroline Kopittke,<sup>a,‡</sup> Maria Götz,<sup>a</sup> Patrick Witzel,<sup>a</sup>, Jacqueline Riffel,<sup>a,§</sup> and Doris Heinrich,<sup>a,b,\*</sup>

<sup>a</sup> *Fraunhofer Institute for Silicate Research ISC, Neunerplatz 2, 97082 Würzburg, Germany.*

<sup>‡</sup> *Present address: Vienna University of Technology Institute of Applied Physics - Biophysics, Getreidemarkt 9, 1060 Vienna, Austria.*

<sup>§</sup> *Present address: RWTH Aachen, Templergraben 55, 52056 Aachen, Germany.*

<sup>b</sup> *Leiden University, Huygens-Kamerlingh Onnes Laboratory, Niels Bohrweg 2, 2333 CA Leiden, The Netherlands.*

## 1 Analysis statistics of investigated samples

**Table S1** Statistical values regarding the cell migration measurements for all investigated sample variations

| Sample name | Number of cells | Analysed videos | Total data points | Data points of moving cells | Mean trajectory length (min) | Min. trajectory length (min) | Max. trajectory length (min) |
|-------------|-----------------|-----------------|-------------------|-----------------------------|------------------------------|------------------------------|------------------------------|
| OC-I        | 103             | 4               | 38871             | 34381                       | 51                           | 14                           | 90                           |
| 52-20       | 133             | 8               | 69793             | 52206                       | 69                           | 14                           | 90                           |
| 165-5       | 163             | 8               | 61819             | 45929                       | 51                           | 13                           | 60                           |
| 165-10      | 138             | 8               | 54055             | 42087                       | 52                           | 14                           | 60                           |
| 165-20      | 103             | 6               | 44117             | 29607                       | 56                           | 20                           | 60                           |
| 421-20      | 113             | 6               | 59558             | 48452                       | 70                           | 18                           | 90                           |

## 2 Cells classified as non-migrating

The finding that nanorough surfaces hinder cell migration is supported by the fact that the ratio of time-points of cells classified as non-migrating is higher on nanorough surfaces (19 % (421-20) up to 33 % (165-20)) compared to the smooth polymer reference (12 % (OC-I)) (Table S2).

**Table S2** Fraction of total measured time points with cells classified as non-migrating for all investigated samples. The cut-off length was set to 5 µm, meaning the cell does not move more than 5 µm relative to their starting position during the whole observed time period.

| Sample name | Non-moving cells (%) |
|-------------|----------------------|
| OC-I        | 12                   |
| 52-20       | 25                   |
| 165-20      | 33                   |
| 421-20      | 19                   |
| 165-5       | 26                   |
| 165-10      | 22                   |
| 165-20      | 33                   |

### 3 Relative number of particles inside prepared composites

**Table S3** Theoretical number of particles per volume unit for all fabricated composites relative to 421-20, which contains the largest particles.

| Sample name | Volume of a single particle ( $\mu\text{m}^3$ ) | Number of particles compared to composite 421-20 |
|-------------|-------------------------------------------------|--------------------------------------------------|
| 52-20       | 0.00007                                         | 531                                              |
| 165-5       | 0.00235                                         | 4                                                |
| 165-10      | 0.00235                                         | 8                                                |
| 165-20      | 0.00235                                         | 17                                               |
| 421-20      | 0.03907                                         | 1                                                |

## 4 Detailed distributions of alpha exponent and instantaneous velocity

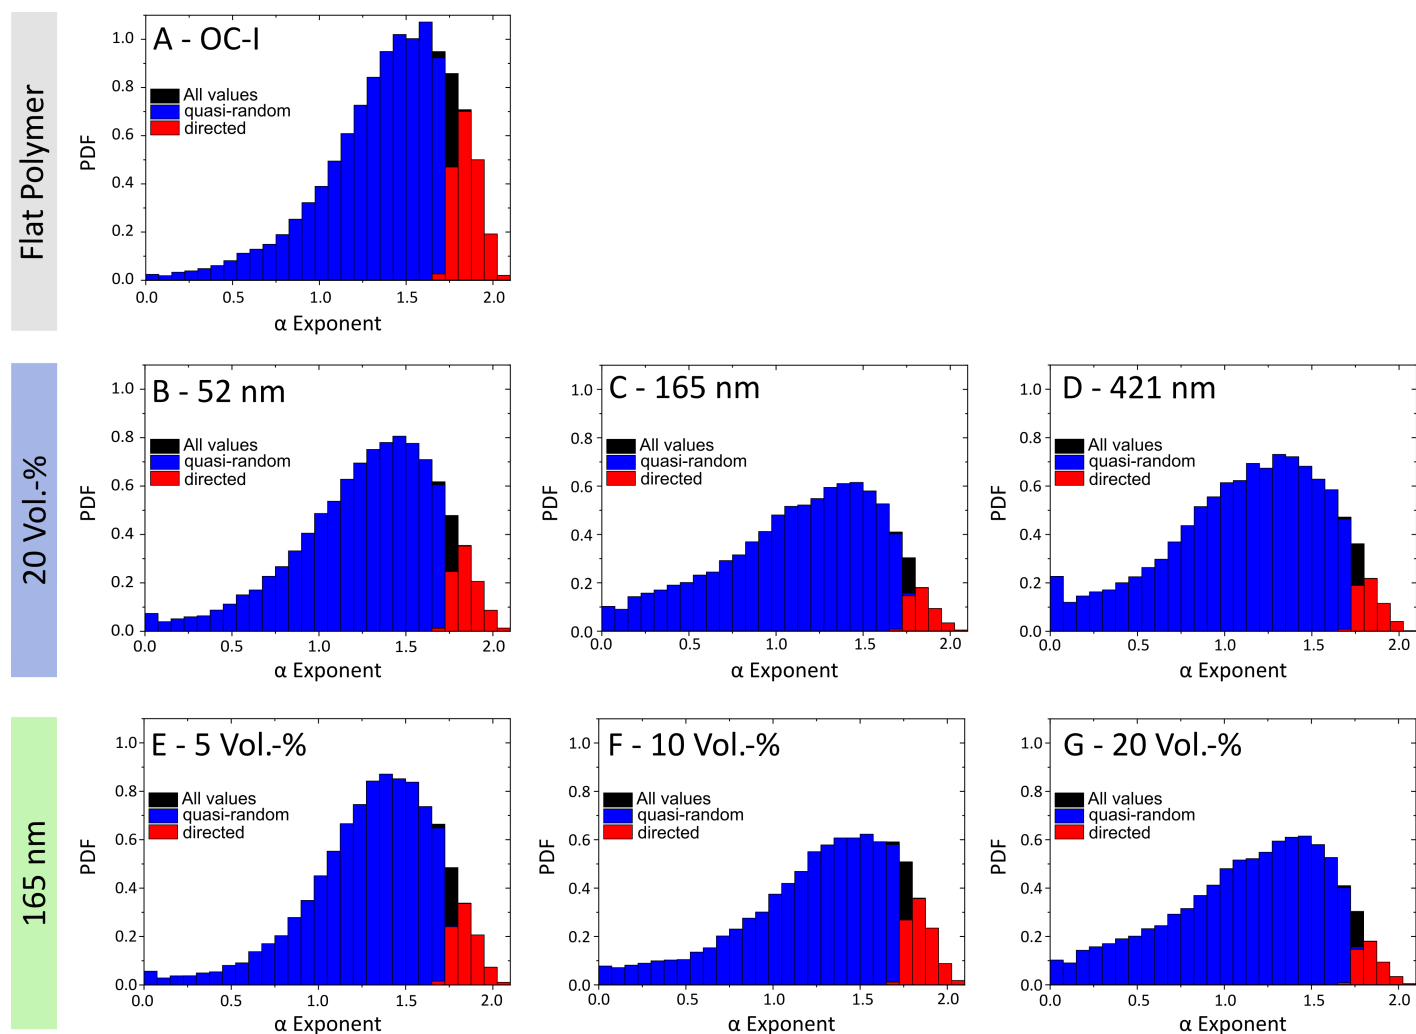

**Fig. S1** Probability density distribution of the alpha exponent of cells classified as moving (red: directed states, blue: quasi-random states, black: all values). OC-I (A) serves as reference, while (B-D) are samples with a constant particle density of 20 Vol.-% and increasing particle diameter from 52 nm (B), 165 nm (C) and 421 nm (D). (E-G) are samples with a constant particle diameter of 165 nm and increasing particle density from 5 Vol.-% (E), 10 Vol.-% (F) and 20 Vol.-% (G).

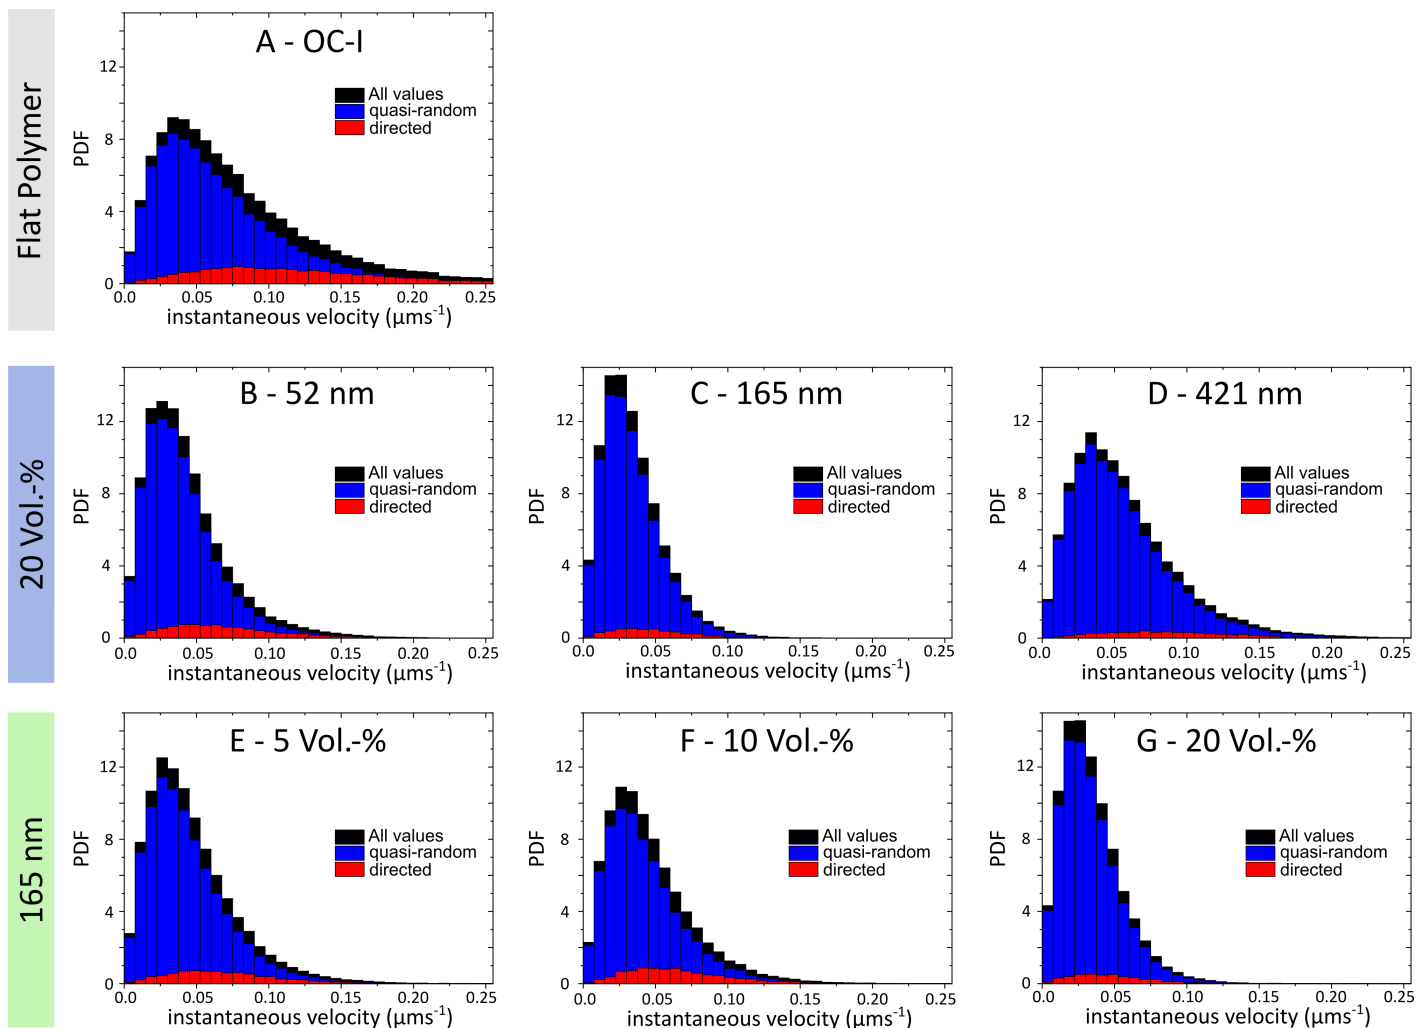

**Fig. S2** Probability density distribution of the instantaneous velocity of cells classified as moving (red: directed states, blue: quasi-random states, black: all values). OC-I (A) serves as reference, while (B-D) are samples with a constant particle density of 20 Vol.-% and increasing particle diameter from 52 nm (B), 165 nm (C) and 421 nm (D). (E-G) are samples with a constant particle diameter of 165 nm and increasing particle density from 5 Vol.-% (E), 10 Vol.-% (F) and 20 Vol.-% (G).



## 5 ORMOCER® coating of silica particles at surface of composite layers

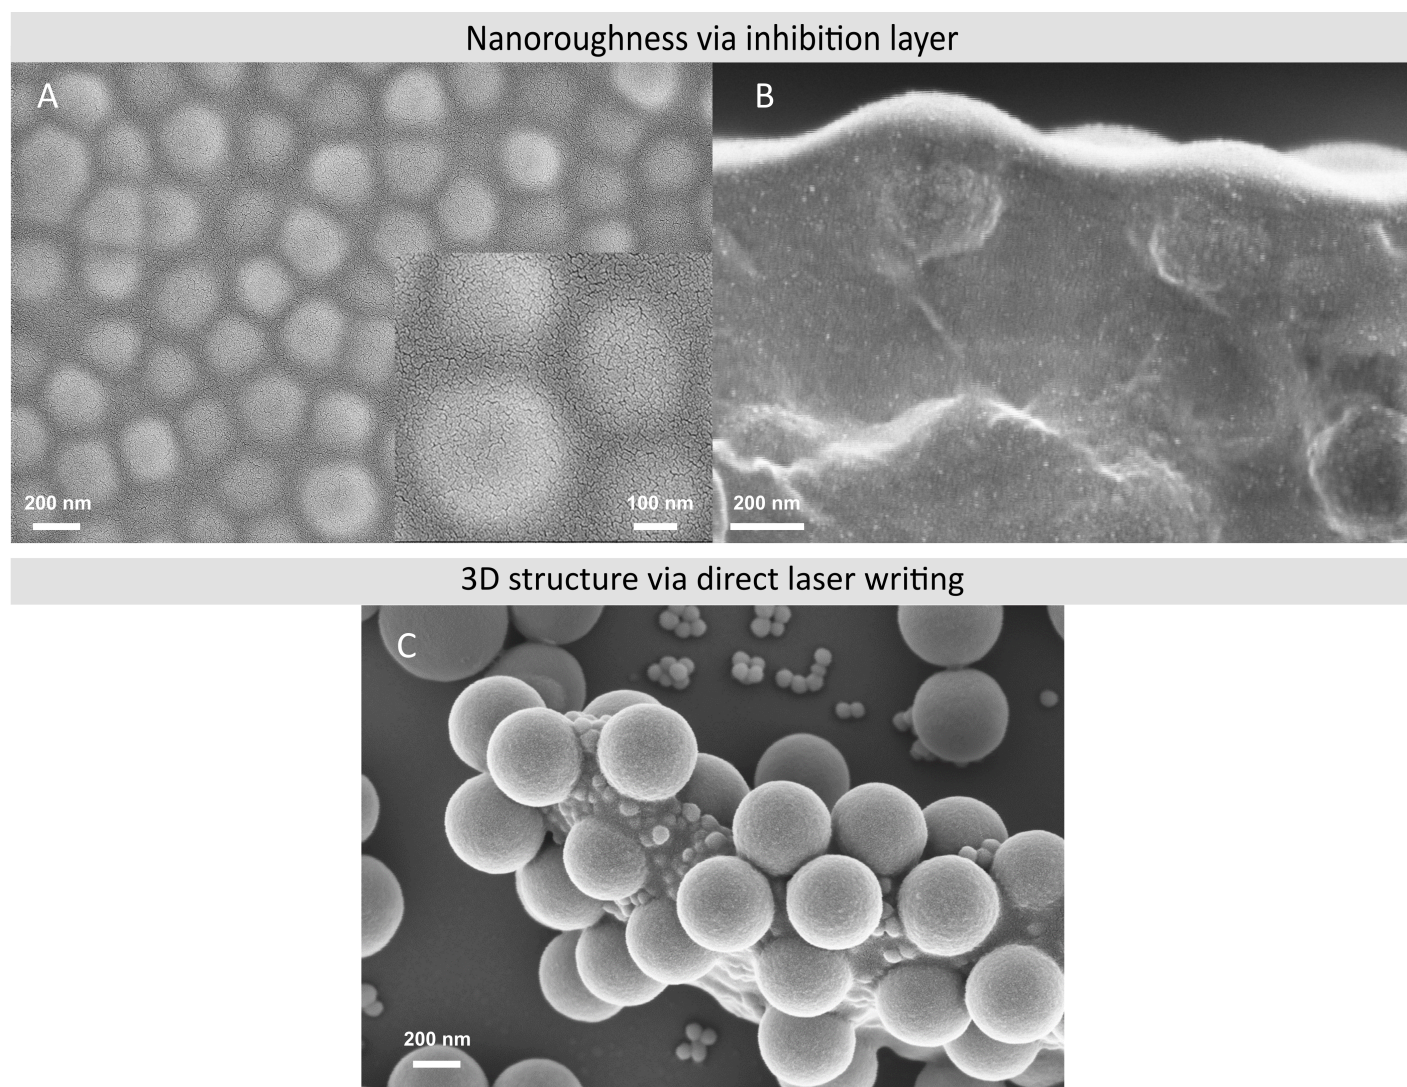

**Fig. S3** Scanning electron microscopy images of ORMOCER® – silica particle composites. A (top-view), B (cross-section) of 421 nm silica particle modified ORMOCER® composite, manufactured using the inhibition layer method. C) 3D structured multi modal composite, polymerized via direct laser writing.

## 6 Contact angle and calculated surface energy

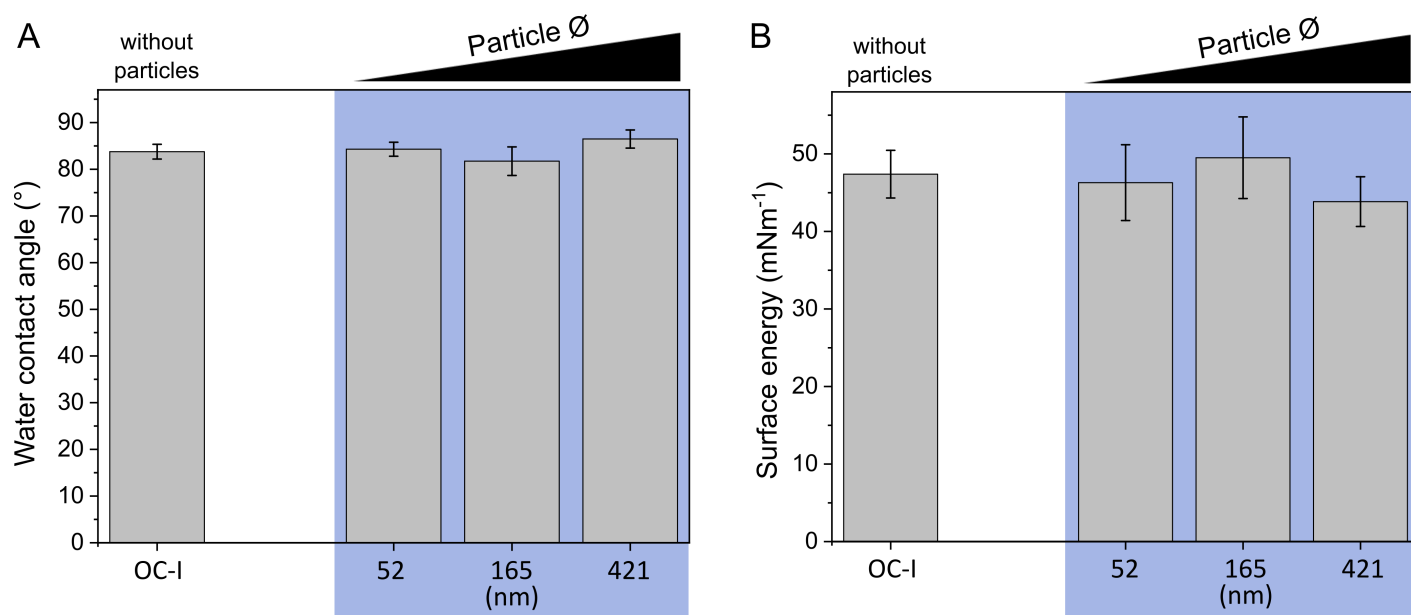

**Fig. S4** A) Water contact angle values for ORMOCER® composites, modified with 20 Vol.-% silica particles as well as a flat reference surface without incorporated particles. B) Calculated surface energy based on water and ethylene glycol contact angle measurements, according to Owen-Wendt method.

## 7 Multi channel migration videos of *D. Discoideum* cells

**Table S4** Exemplary migration time-lapse videos of *D. discoideum* cells.

| Sample name | Video file name |
|-------------|-----------------|
| OC-I        | S1 - OC-I       |
| 52-20       | S2 - 52-20      |
| 165-5       | S3 - 165-5      |
| 165-10      | S4 - 165-10     |
| 165-20      | S5 - 165-20     |
| 421-20      | S6 - 421-20     |
